# Supplementary material
Source: MDPI journal article supplement (https://www.mdpi.com/0718-1876/16/3/22)

Figure 1: Proposed Research Model

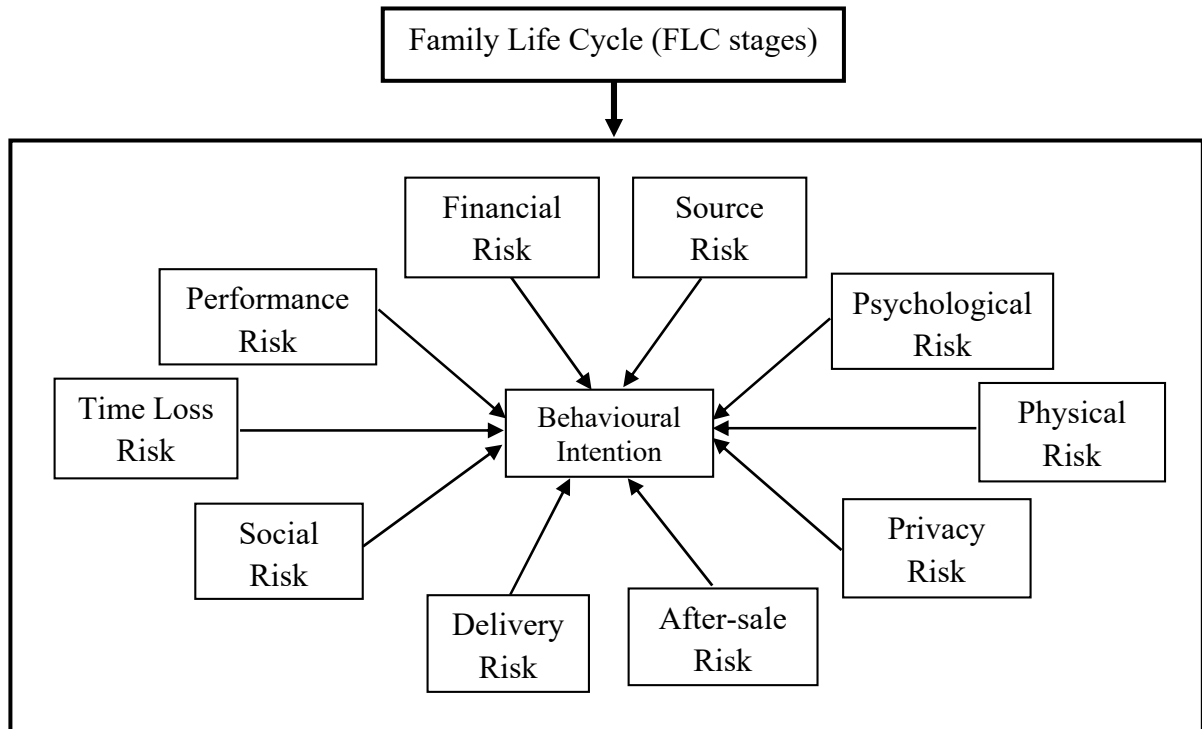

Figure 2. Structural Equation Modelling (SEM) Analysis of the Research Model.

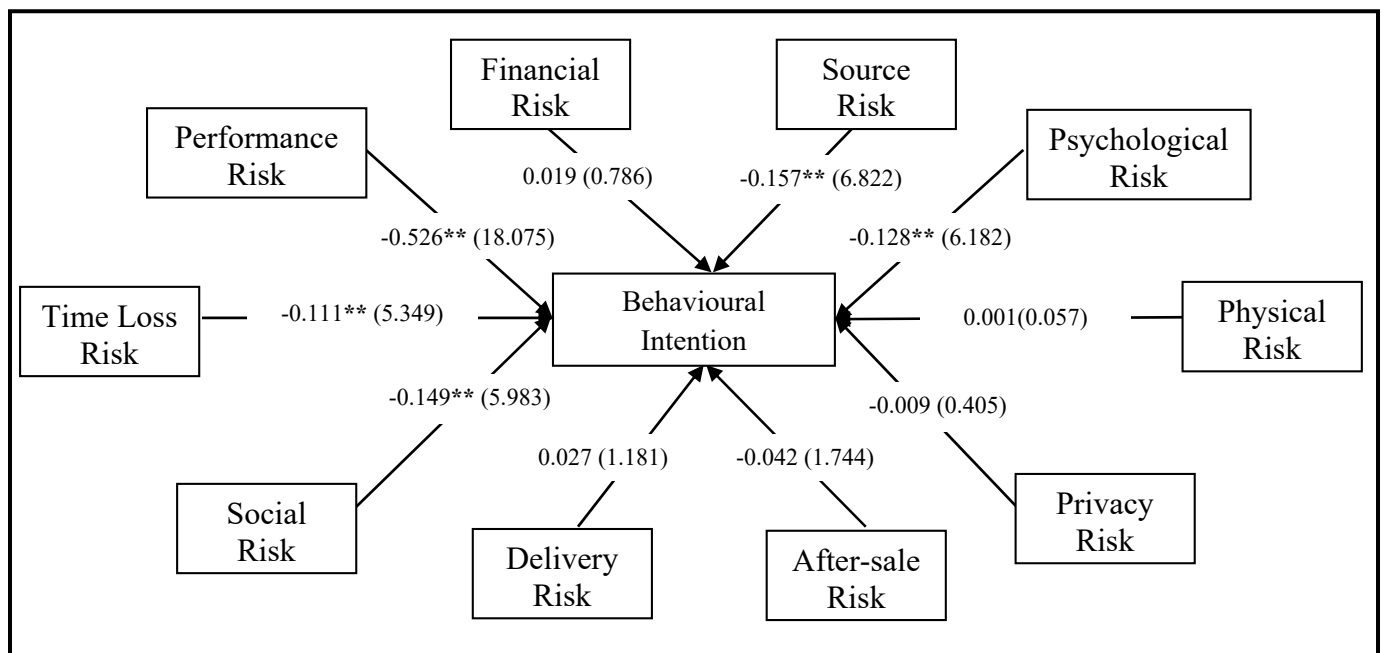

Supplement: s1 [file s1]
